# Supplementary material
Source: PubMed Central journal article supplement (PMC3799355)
Supplement: 1307758110_pnas.201307758SI.pdf [file 1307758110_pnas.201307758SI.pdf]

# Supporting Information

Diffenbaugh et al. 10.1073/pnas.1307758110

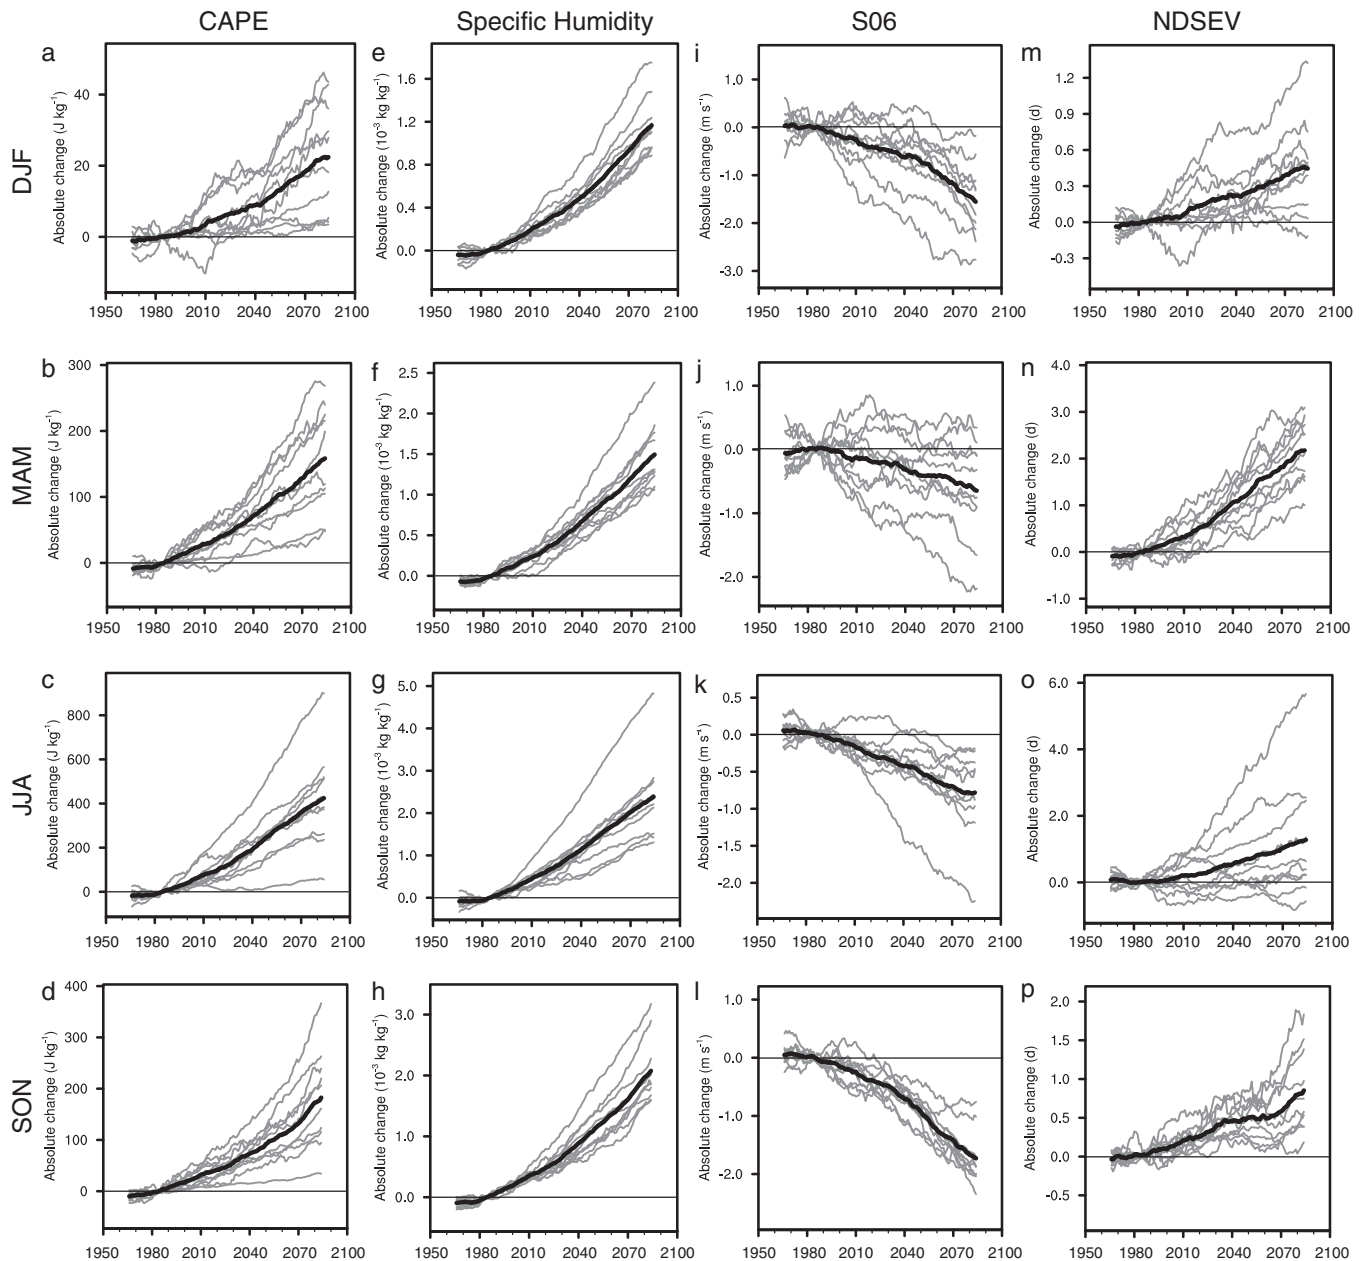

**Fig. S1.** Response of severe thunderstorm environments in the late 21st century period of representative concentration pathway (RCP)8.5 during the winter (DJF), spring (MAM), summer (JJA), and autumn (SON) seasons. Each gray line shows an individual model realization. For each realization, the anomaly in the regional average value of the grid points in the eastern United States (105–67.5°W, 25–50°N; land points only) is calculated for each year in the 21st century, with the anomaly expressed as the absolute difference from the 1970–1999 baseline value. A 31-y running mean then is applied to each time series of percentage anomalies. The black line shows the mean of the individual realizations. (A–D) CAPE. (E–H) Specific humidity. (I–L) S06. (M–P) NDSEV.

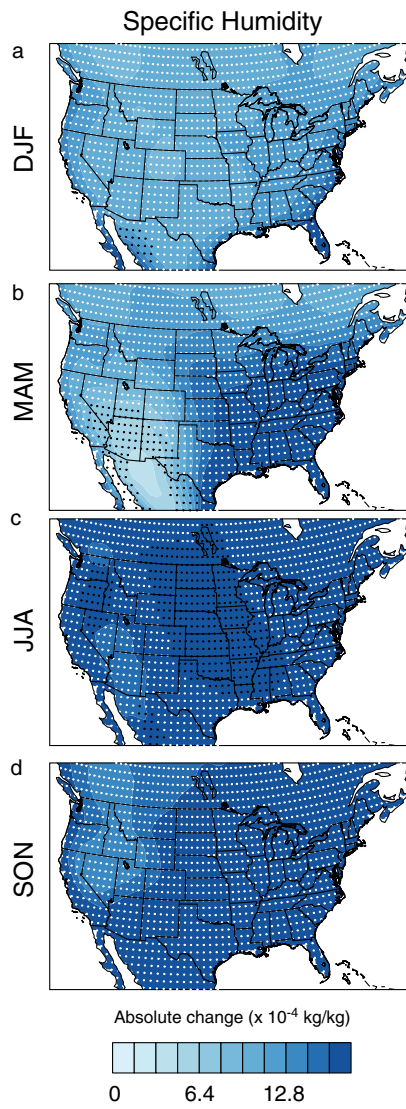

**Fig. S2.** As in Fig. 2, but for surface-specific humidity. (A–D) Absolute difference in specific humidity.

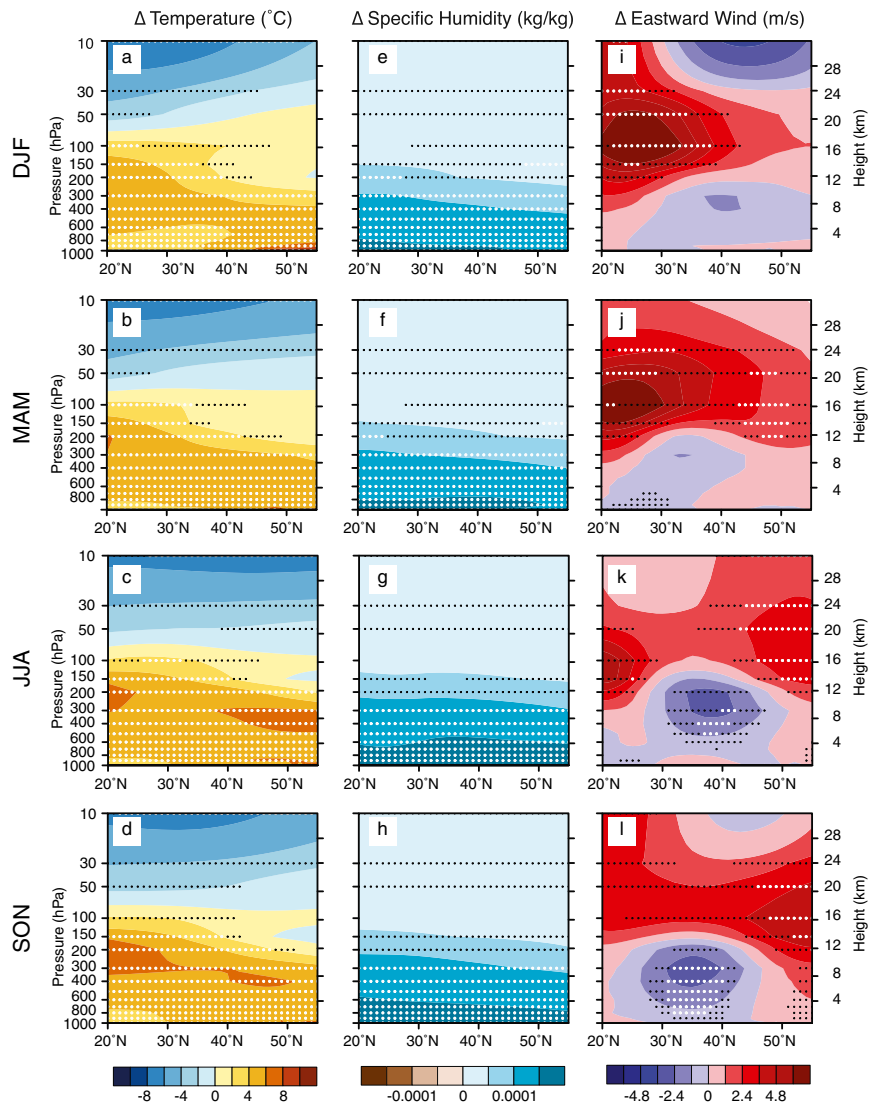

**Fig. S3.** As in Fig. 3, but for the winter (DJF), spring (MAM), summer (JJA), and autumn (SON) seasons. (A–D) Absolute difference in temperature. (E–H) Absolute difference in specific humidity. (I–L) Absolute difference in eastward wind.

















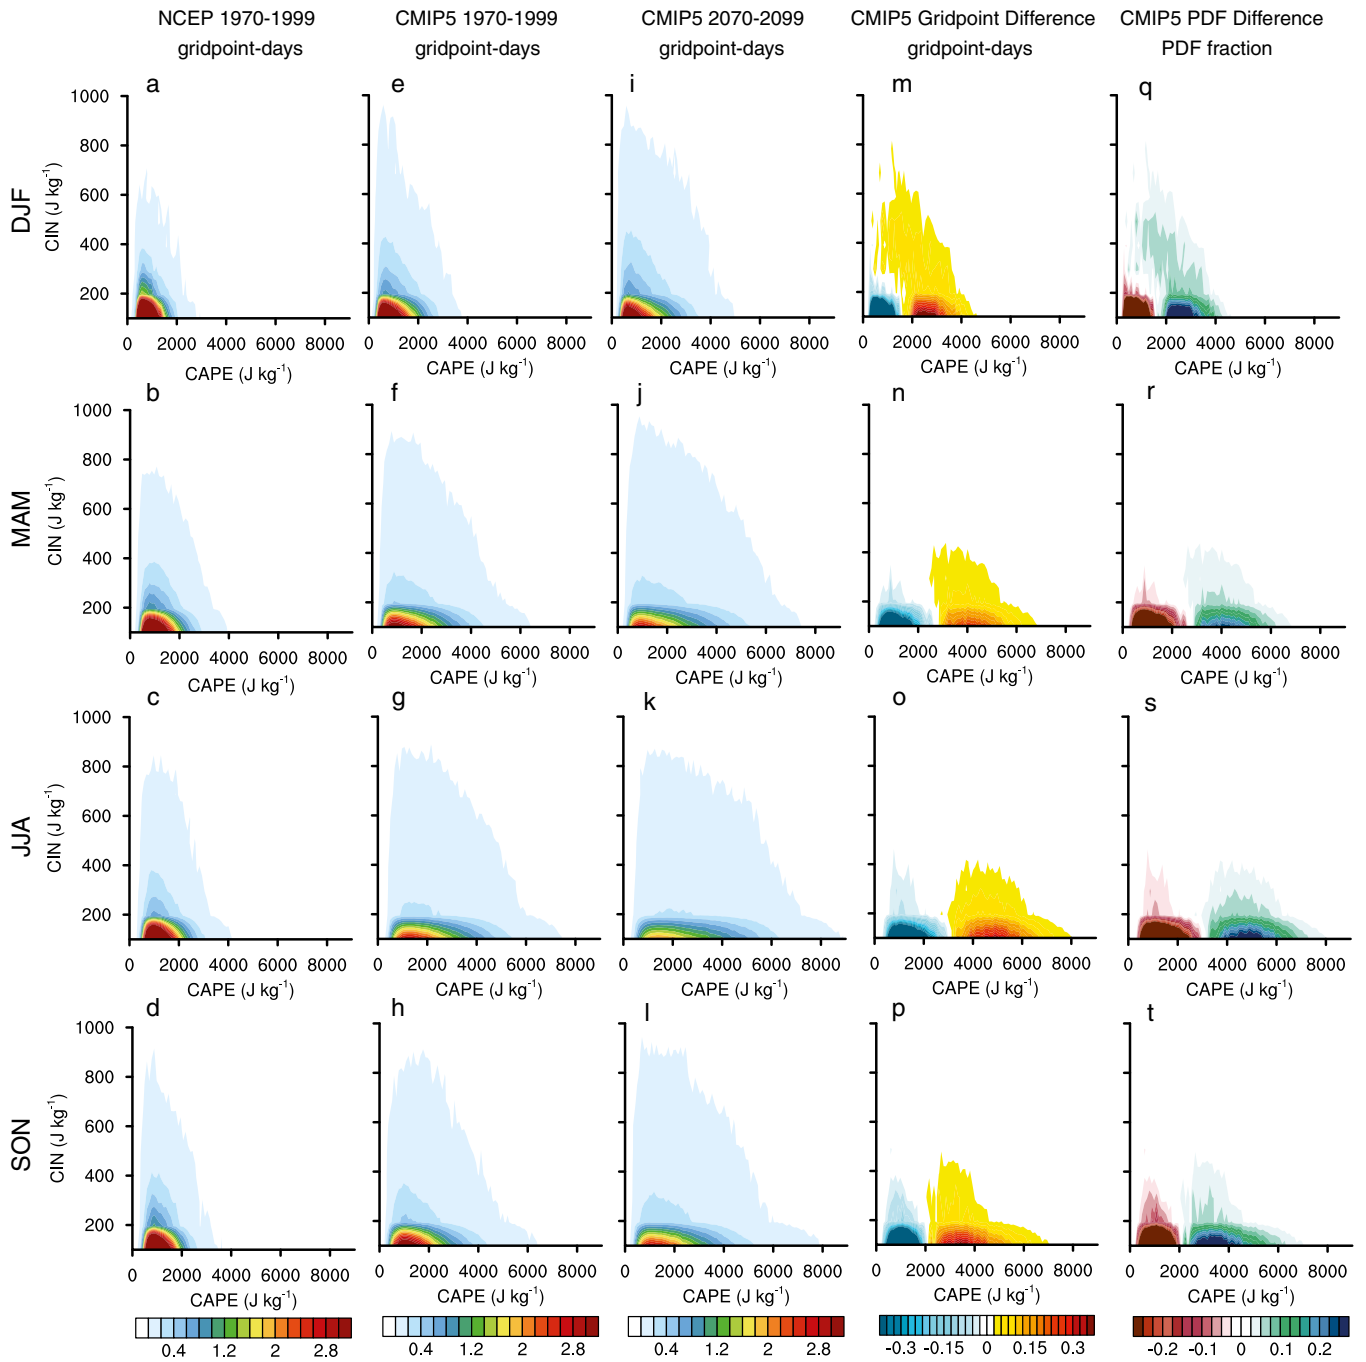

**Fig. S12.** The frequency of occurrence of daily CAPE and convective inhibition (CIN) in the winter (DJF), spring (MAM), summer (JJA), and autumn (SON) seasons. Occurrences are counted for land grid points in the eastern United States ( $105\text{--}67.5^\circ\text{W}$ ,  $25\text{--}50^\circ\text{N}$ ; land grid points only) for days in which the SEV threshold is met. (A–D) Number of occurrences in the 1970–1999 period of the NCEP reanalysis. (E–L) Ensemble-mean number of occurrences in the 1970–1999 (E–H) and 2070–2099 (I–L) periods of the CMIP5 ensemble. (M–P) Absolute difference in the ensemble-mean number of occurrences between the 1970–1999 and 2070–2099 periods of the CMIP5 ensemble. (Q–T) Absolute difference in the ensemble-mean PDF of occurrence between the 1970–1999 and 2070–2099 periods of the CMIP5 ensemble. CIN is expressed as the absolute magnitude of the most negative accumulated buoyant energy below the level of free convection, yielding positive values in units of joules per kilogram.



**Table S1. CMIP5 models and realizations used in the reported analyses**

| Model         | Realization ID (historical/RCP8.5) | Horizontal grid* | Vertical grid, levels |
|---------------|------------------------------------|------------------|-----------------------|
| bcc-csm-1     | 1                                  | 64 × 128         | 26                    |
| CanESM2       | 1                                  | 64 × 128         | 35                    |
| CCSM4         | 6                                  | 192 × 288        | 26                    |
| CSIRO-Mk3-6-0 | 1                                  | 96 × 192         | 18                    |
| FGOALS-g2     | 1                                  | 60 × 128         | 26                    |
| GFDL-CM3      | 1                                  | 90 × 144         | 48                    |
| GFDL-ESM2M    | 1                                  | 90 × 144         | 24                    |
| IPSL-CM5A-LR  | 1                                  | 143 × 144        | 39                    |
| MIROC5        | 1                                  | 128 × 256        | 40                    |
| NorESM1-M     | 1                                  | 96 × 144         | 26                    |

\*Lateral points × longitudinal points.

**Table S2. Regional CIN and CAPE values for the 1970–1999 baseline period over the eastern United States**

| Season | Model         | Mean CIN | Mean CAPE | CIN spatial correlation | CAPE spatial correlation |
|--------|---------------|----------|-----------|-------------------------|--------------------------|
| DJF    | NCEP          | 4.047    | 92.095    | —                       | —                        |
|        | bcc-csm1-1    | 2.563    | 117.368   | 0.67                    | 0.827                    |
|        | CanESM2       | 4.569    | 181.753   | 0.649                   | 0.919                    |
|        | CCSM4         | 0.599    | 32.722    | 0.492                   | 0.86                     |
|        | CSIRO-Mk3-6-0 | 1.491    | 59.524    | 0.773                   | 0.918                    |
|        | FGOALS-g2     | 1.002    | 34.91     | 0.617                   | 0.771                    |
|        | GFDL-CM3      | 4.742    | 87.717    | 0.799                   | 0.935                    |
|        | GFDL-ESM2M    | 3.971    | 64.194    | 0.66                    | 0.858                    |
|        | IPSL-CM5A-LR  | 3.413    | 129.792   | 0.661                   | 0.819                    |
|        | MIROC5        | 2.622    | 113.265   | 0.609                   | 0.916                    |
|        | NorESM1-M     | 1.885    | 116.736   | 0.684                   | 0.924                    |
| MAM    | NCEP          | 30.997   | 407.301   | —                       | —                        |
|        | bcc-csm1-1    | 13.957   | 577.251   | 0.463                   | 0.823                    |
|        | CanESM2       | 30.622   | 797.786   | 0.479                   | 0.794                    |
|        | CCSM4         | 15.358   | 207.114   | 0.642                   | 0.744                    |
|        | CSIRO-Mk3-6-0 | 33.813   | 377.458   | 0.78                    | 0.842                    |
|        | FGOALS-g2     | 27.895   | 316.919   | 0.676                   | 0.87                     |
|        | GFDL-CM3      | 33.775   | 391.107   | 0.836                   | 0.909                    |
|        | GFDL-ESM2M    | 32.014   | 451.874   | 0.751                   | 0.906                    |
|        | IPSL-CM5A-LR  | 24.226   | 486.749   | 0.579                   | 0.589                    |
|        | MIROC5        | 16.869   | 652.395   | 0.419                   | 0.859                    |
|        | NorESM1-M     | 10.678   | 649.908   | 0.564                   | 0.842                    |
| JJA    | NCEP          | 59.08    | 717.624   | —                       | —                        |
|        | bcc-csm1-1    | 53.617   | 1,494.963 | 0.077                   | 0.641                    |
|        | CanESM2       | 80.335   | 1,617.55  | −0.468                  | 0.438                    |
|        | CCSM4         | 71.175   | 421.951   | 0.322                   | 0.49                     |
|        | CSIRO-Mk3-6-0 | 137.232  | 931.845   | 0.484                   | 0.706                    |
|        | FGOALS-g2     | 148.704  | 802.925   | 0.424                   | 0.772                    |
|        | GFDL-CM3      | 90.216   | 906.819   | 0.724                   | 0.652                    |
|        | GFDL-ESM2M    | 87.671   | 1,189.656 | 0.619                   | 0.707                    |
|        | IPSL-CM5A-LR  | 74.74    | 1,128.295 | 0.4                     | 0.615                    |
|        | MIROC5        | 58.597   | 1,678.156 | −0.349                  | 0.658                    |
|        | NorESM1-M     | 32.639   | 1,800.199 | 0.312                   | 0.527                    |
| SON    | NCEP          | 21.882   | 403.085   | —                       | —                        |
|        | bcc-csm1-1    | 15.749   | 804.229   | 0.205                   | 0.83                     |
|        | CanESM2       | 26.922   | 709.78    | −0.021                  | 0.744                    |
|        | CCSM4         | 11.93    | 196.584   | 0.355                   | 0.584                    |
|        | CSIRO-Mk3-6-0 | 23.764   | 424.775   | 0.726                   | 0.883                    |
|        | FGOALS-g2     | 25.538   | 363.089   | 0.599                   | 0.901                    |
|        | GFDL-CM3      | 25.65    | 341.35    | 0.702                   | 0.891                    |
|        | GFDL-ESM2M    | 25.038   | 462.585   | 0.719                   | 0.899                    |
|        | IPSL-CM5A-LR  | 24.781   | 565.339   | 0.667                   | 0.791                    |
|        | MIROC5        | 20.594   | 712.71    | 0.101                   | 0.864                    |
|        | NorESM1-M     | 11.071   | 810.931   | 0.336                   | 0.808                    |

Mean CIN and mean CAPE are the mean values of grid points in the eastern US region (105–67.5°W, 25–50°N; land points only). CIN spatial correlation and CAPE spatial correlation are the spatial correlations between the grid point seasonal-mean values in the NCEP reanalysis and the corresponding grid point seasonal-mean values in the respective CMIP5 models, calculated after regridding to the common 1° geographical grid. Calculations are made using the 1° grid point values without area weighting.
